# Supplementary material for: A novel anti-aldolase C antibody specifically interacts with residues 85–102 of the protein
Source: PubMed Central journal article supplement — MAbs. 2014 Feb 13;6(3):707–16. doi: 10.4161/mabs.28191 (PMC4011915; doi:10.4161/mabs.28191), 2014-02-13
Supplement: mabs-6-707-s01.pdf [file mabs-6-707-s01.pdf]

**Supplemental Material to:**

**Simona Langellotti, Maurizio Romano, Corrado  
Guarnaccia, Vincenzo Granata, Stefania Orrù,  
Adriana Zagari, Francisco Ernesto Baralle,  
Francesco Salvatore**

**A novel anti-aldolase C antibody specifically interacts with  
residues 85-102 of the protein**

**2014; mAbs 6(3)**

**<http://dx.doi.org/10.4161/mabs.28191>**

**<https://www.landesbioscience.com/journals/mabs/article/28191/>**

**Supplemental Material to:**

**Simona Langellotti, Maurizio Romano, Corrado Guarnaccia, Vincenzo Granata, Stefania  
Orrù, Adriana Zagari, Francisco E.Baralle, Francesco Salvatore**

**A novel anti-aldolase C antibody specifically interacts with residues 85-102 of  
the protein**

**Supplementary Figure 1:** Far-UV CD spectrum of full length human aldolase C recorded under conditions described in the text.

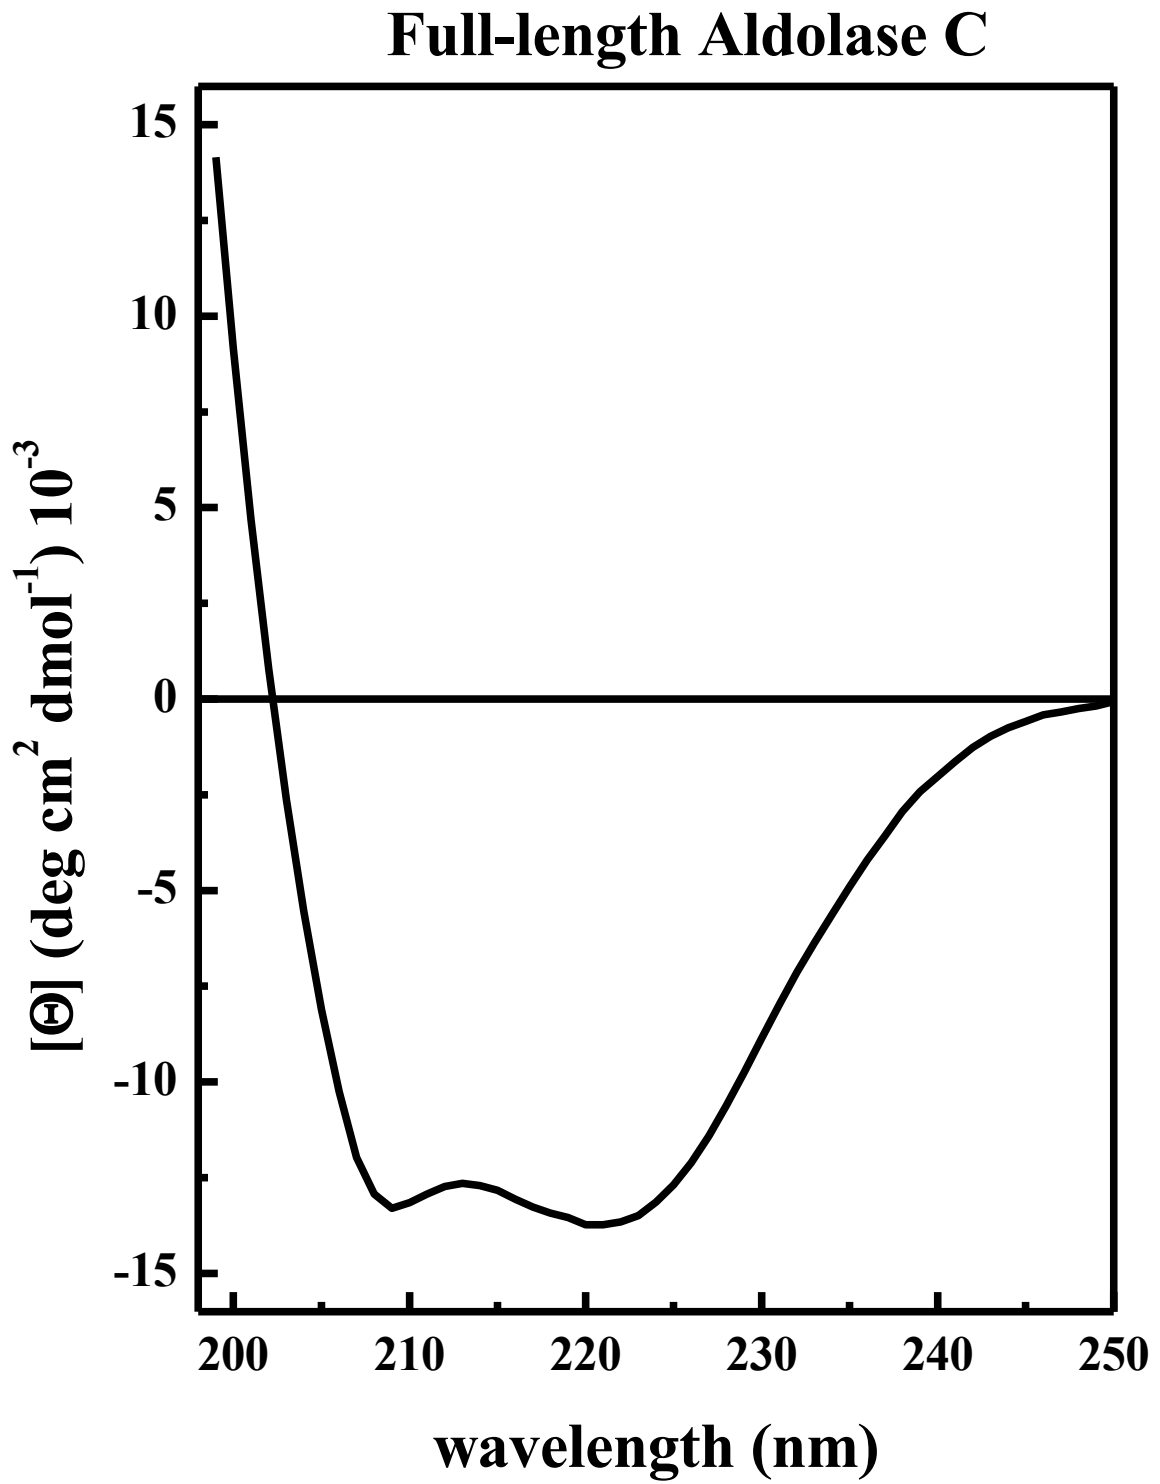

**Supplementary Figure 2:** Time evolution SPR sensorgrams for the binding of 9F mAb with (A) full length human aldolase C and with (B) peptide 85-102. SPR sensorgrams (dot lines) are reported with the corresponding fit (solid lines), based on a 1:1 binding model. The sensorgrams were obtained at a contact time of 60 s, a dissociation time of 180 s, a flow rate of 60  $\mu\text{L}/\text{min}$  and at 9F mAb concentrations from 2 nM to 200 nM, as indicated.

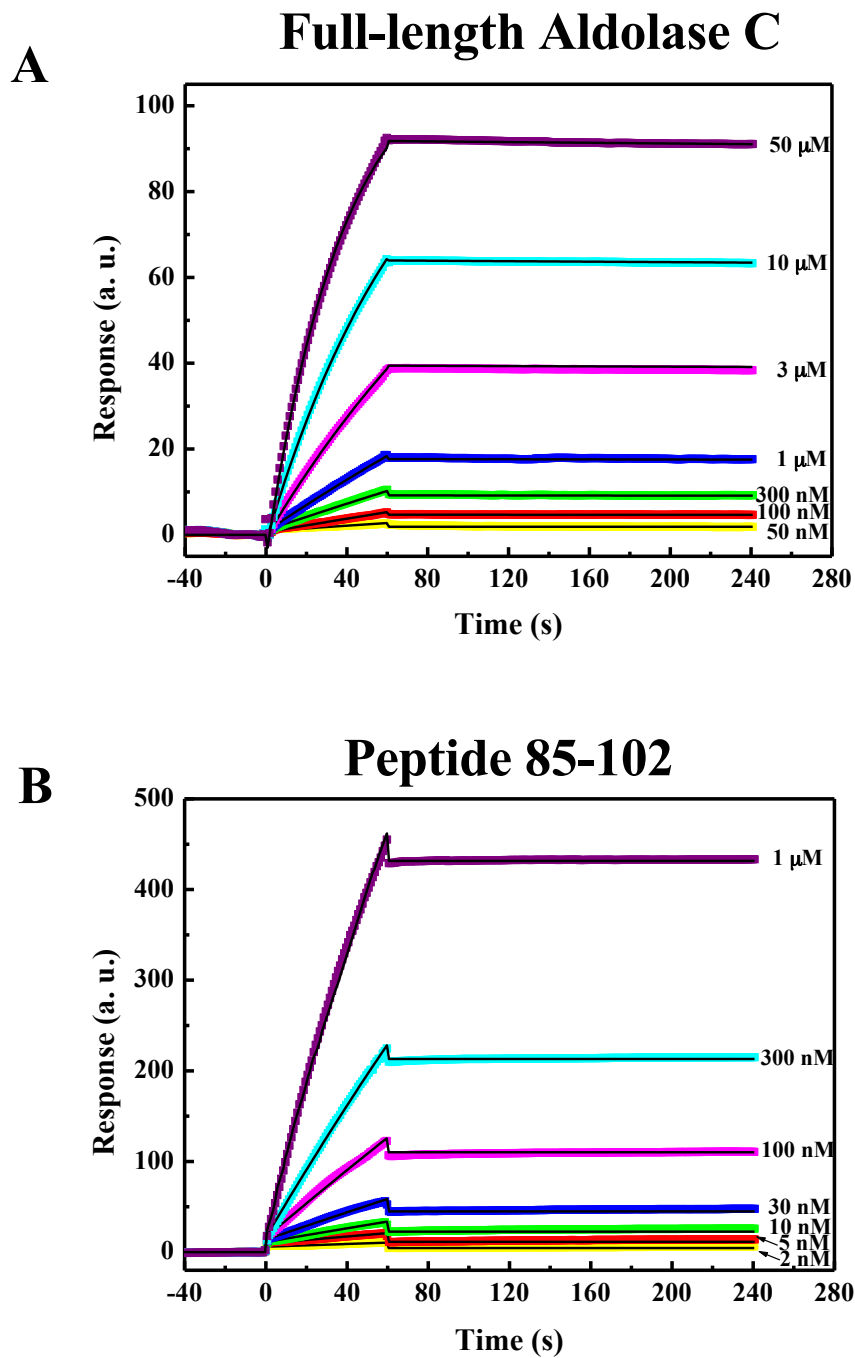

**Supplementary Table S1.** Cloning of human aldolase C full length protein and fragments in the p3xFLAG CMV 7.1 vector (Sigma E4026).

| Aldolase C PROTEIN REGION (clone name)         | PRIMER PAIRS                                                                                                                                                                                  | PCR PRODUCT LENGTH (including primers) | MW of the fusion protein and total number of aa residues | Translation (including the 3xFLAG peptide at the N-term)                                                                                                                                                                                                                                                                                                                                                                                                                                                                                                                                                                                                    |
|------------------------------------------------|-----------------------------------------------------------------------------------------------------------------------------------------------------------------------------------------------|----------------------------------------|----------------------------------------------------------|-------------------------------------------------------------------------------------------------------------------------------------------------------------------------------------------------------------------------------------------------------------------------------------------------------------------------------------------------------------------------------------------------------------------------------------------------------------------------------------------------------------------------------------------------------------------------------------------------------------------------------------------------------------|
| aa 1-364 (Full length protein or 3xFLAG-AldoC) | <p><i>hAldoC 1-364 aa Kpn1</i><br/>5'gggtacctcatATGCCTCACTCGTACC3'</p> <p><i>hAldoC 1-364aa Xba1</i><br/>5'tgctctagaTCAGTAGGCATGTTGGCAA3'</p>                                                 | 1116 bp                                | 43 kDa<br>390 aa                                         | <p><u>MDYKDHDGDYKDHDIDYKDDDDKLE</u><br/> <u>FMPHSYPALSAEQKKELSDIALRIVAP</u><br/>           GKGILAADESVGSMARLSQIGVENT<br/>           EENRRLYRQVLFSAADDRVKKCIGGVI<br/>           FFHETLYQKDDNGVPFVRTIQDKGIV<br/>           VGIKVDKGVVPLAGTDGETTTQGLD<br/>           GLSERCAQYKKGADFAKWRCVLKI<br/>           SERTPSALAIENANVLARYASICQQ<br/>           NGIVPIVEPEILPDGDHDLKRCQYVTE<br/>           KVLAAVYKALSDHHVYLEGTLKPNM<br/>           VTPGHACPIKYTPEEIAMATVTALRRT<br/>           VPPAVPGVTFLSGGQSEEEASFNLN<br/>           AINRCPLRPWALTFYGRALQASAL<br/>           NAWRGQRDNAGAATEEFIKRAEVNG<br/>           LAAQKYEKSGEDGGAAAQSLYIAN<br/>           HAY</p> |
| aa 1-210 (clone 1)                             | <p><i>hAldoC 1-100aa Hind3-EcoR1</i><br/>5'actaagcttgaattcATGCCTCACTCGTACCCAGCCCTTT3'</p> <p><i>hAldoC 101-210aa NotI-XbaI</i><br/>5'tgatctagaggcggccgctcaCAAGACCTTCTCTGTAACATACTGACA3'</p>   | 666 bp                                 | 26 kDa<br>236 aa                                         | <p><u>MDYKDHDGDYKDHDIDYKDDDDKLE</u><br/> <u>FMPHSYPALSAEQKKELSDIALRIVAP</u><br/>           GKGILAADESVGSMARLSQIGVENT<br/>           EENRRLYRQVLFSAADDRVKKCIGGVI<br/>           FFHETLYQKDDNGVPFVRTIQDKGIV<br/>           VGIKVDKGVVPLAGTDGETTTQGLD<br/>           GLSERCAQYKKGADFAKWRCVLKI<br/>           SERTPSALAIENANVLARYASICQQ<br/>           NGIVPIVEPEILPDGDHDLKRCQYVTE<br/>           KVL</p>                                                                                                                                                                                                                                                       |
| aa 1-100 (clone 1A)                            | <p><i>hAldoC 1-100aa Hind3-EcoR1</i><br/>5'actaagcttgaattcATGCCTCACTCGTACCCAGCCCTTT3'</p> <p><i>hAldoC 1-100aa NotI-XbaI</i><br/>5'tgatctagaggcggccgctcaATCCGATGGTTTCGGACGAAGGCAA3'</p>       | 336 bp                                 | 15 kDa<br>126 aa                                         | <p><u>MDYKDHDGDYKDHDIDYKDDDDKLE</u><br/> <u>FMPHSYPALSAEQKKELSDIALRIVAP</u><br/>           GKGILAADESVGSMARLSQIGVENT<br/>           EENRRLYRQVLFSAADDRVKKCIGGVI<br/>           FFHETLYQKDDNGVPFVRTIQD</p>                                                                                                                                                                                                                                                                                                                                                                                                                                                   |
| aa 101-210 (clone 1B)                          | <p><i>hAldoC 101-210aa Hind3-EcoR1</i><br/>5'actaagcttgaattcAAGGGCATCGTCTGGGCATCAAGGT3'</p> <p><i>hAldoC 101-210aa NotI-XbaI</i><br/>5'tgatctagaggcggccgctcaCAAGACCTTCTCTGTAACATACTGACA3'</p> | 366 bp                                 | 16 kDa<br>136 aa                                         | <p><u>MDYKDHDGDYKDHDIDYKDDDDKLE</u><br/> <u>FKGIVVGIKVDKGVVPLAGTDGETTT</u><br/> <u>QGLDGLSERCAQYKKGADFAKWR</u><br/> <u>CVLKISERTPSALAIENANVLARYASI</u><br/> <u>CQQNGIVPIVEPEILPDGDHDLKRCQ</u><br/> <u>YVTEKVL</u></p>                                                                                                                                                                                                                                                                                                                                                                                                                                       |

|                                     |                                                                                                                                                                                              |               |                               |                                                                                                                                                                                                                                                                                                                                                 |
|-------------------------------------|----------------------------------------------------------------------------------------------------------------------------------------------------------------------------------------------|---------------|-------------------------------|-------------------------------------------------------------------------------------------------------------------------------------------------------------------------------------------------------------------------------------------------------------------------------------------------------------------------------------------------|
| <p>aa<br/>101-300<br/>(clone 2)</p> | <p><i>hAldoC 101-210aa Hind3-EcoR1</i><br/>5'actaagcttgaattcAAGGGCATCGTCGTGGGCATCAAGGT3'</p> <p><i>hAldoC 210-300aa NotI-XbaI</i><br/>5'tgatctagaggcggccgctcaGAAGGTAAGCGCCCAGGGTCGGGAA3'</p> | <p>636 bp</p> | <p>25 kDa<br/><br/>226 aa</p> | <p><u>MDYKDHDGDYKDHDIDYKDDDDKLE</u><br/><u>FKGIVVGIKVDKGVVPLAGTDGETTT</u><br/><u>QGLDGLSERCAQYKKDGADFAKWR</u><br/><u>CVLKISERTPSALAILENANVLARYASI</u><br/><u>CQQNGIVPIVEPEILPDGDHDLKRCQ</u><br/><u>YVTEKVLAAVYKALSDHHVYLEGTLL</u><br/><u>KPNMVTPGHACPIKYTPEEIAMATVT</u><br/><u>ALRRTVPPAVPGVTFSLGGQSEEEA</u><br/><u>SFNLNAINRCPLRPWALTF</u></p> |
| <p>aa<br/>210-364<br/>(clone 3)</p> | <p><i>hAldoC 210-300aa Hind3-EcoR1</i><br/>5'actaagcttgaattcGCTGCTGTGTACAAGGCCCTGAGTGA3'</p> <p><i>hAldoC 299-364aa NotI-XbaI</i><br/>5'tgatctagaggcggccgcTCAGTAGGCATGGTTGGCAATGTAGAA3'</p>  | <p>504 bp</p> | <p>20 kDa<br/><br/>182 aa</p> | <p><u>MDYKDHDGDYKDHDIDYKDDDDKLE</u><br/><u>FAAVYKALSDHHVYLEGTLLKPNMVT</u><br/><u>PGHACPIKYTPEEIAMATVTALRRTV</u><br/><u>PPAVPGVTFSLGGQSEEEASFNLNAI</u><br/><u>NRCPLRPWALTFTFSYGRALQASA</u><br/><u>LNAWRGQRDNAGAATEEFIKRAEVN</u><br/><u>GLAAQKYEKSGEDGGAAAQSLYIA</u><br/><u>NHAY</u></p>                                                          |

**Supplementary Table S2.** Cloning of human aldolase C peptides in the pEGFP-C2 expression vector (Clontech, catalog n. 6083-1).

| <b>Aldolase C peptidic residues (clone name)</b>  | <b>PRIMER PAIRS</b>                                                                                                                                                                                                                       | <b>Recombinant product</b>       |
|---------------------------------------------------|-------------------------------------------------------------------------------------------------------------------------------------------------------------------------------------------------------------------------------------------|----------------------------------|
| aa 2-17<br><br>(pEGFP-C2 +Aldolase C aa 2-17)     | <i>AldoC_2-17s</i><br>5'TCGAGCGGGAGTGGGAGTGGACCTCACTCGTACCCAG<br>CCCTTTCTGCTGAGCAGAAGAAGGAGTTGTCTTGAG 3'<br><i>AldoC_2-17as</i><br>5'GATCCTCAAGACAACCTCTTCTTGCTCAGCAGAAAG<br>GGCTGGGTACGAGTGAGGTCCACTCCCCTCCCGC 3'                        | GFP-GSGSG-<br>PHSYPALSAEQKKELS   |
| aa 41-58<br><br>(pEGFP-C2 +Aldolase C aa 41-58)   | <i>AldoC_41-58s</i><br>5'TCGAGCGGGAGTGGGAGTGGAGCCAAGCGGCTGAGC<br>CAAATTGGGGTGGAAAACACAGAGGAGAACCGCCGGCT<br>GTGAG3'<br><i>AldoC_41-58as</i><br>5'GATCCTCACAGCCGGCGGTTCTCCTCTGTGTTTTCCAC<br>CCCAATTTGGCTCAGCCGCTTGGCTCCACTCCCCTCC<br>GC3'   | GFP-GSGSG-<br>AKRLSQIGVENTEENRRL |
| aa 60-75<br><br>(pEGFP-C2 +Aldolase C aa 60-75)   | <i>AldoC_60-75s</i><br>5'TCGAGCGGGAGTGGGAGTGGACGCCAGGTCCTGTTC<br>AGTGCTGATGACCGTGTGAAAAGTGCATTGGATGAG3'<br><i>AldoC_60-75as</i><br>5'GATCCTCATCCAATGCACTTTTTTACACGGTCATCAGC<br>ACTGAACAGGACCTGGCGTCCACTCCCCTCCCGC3'                       | GFP-GSGSG-<br>RQVLFSADDRVKKCIG   |
| aa 85-102<br><br>(pEGFP-C2 +Aldolase C aa 85-102) | <i>AldoC_85-102s</i><br>5'TCGAGCGGGAGTGGGAGTGGATACCAGAAAGATGATA<br>ATGGTGTTCCTTCGTCCGAACCATCCAGGATAAAGGGCT<br>GAG3'<br><i>AldoC_85-102as</i><br>5'GATCCTCAGCCCTTATCCTGGATGGTTCCGACGAAGG<br>GAACACCATTATCATCTTTCTGGTATCCACTCCCCTCC<br>GC3' | GFP-GSGSG-<br>YQKDDNGVPFVRTIQDKG |
